# Supplementary material for: Detecting dementia in patients with normal neuropsychological screening by Short Smell Test and Palmo-Mental Reflex Test: an observational study
Source: Springer Nature journal article supplement (doi:10.1186/s12877-015-0094-0), 2015-07-23
Supplement: MOESM1 [file 9738722]

## **Appendix Table 1**

### **Standard procedure for the evaluation of dementia at the Memory Clinic of the Department of Geriatrics, (Inselspital, Bern University Hospital, and) Spital Netz Bern Ziegler, and University of Bern, Switzerland**

#### **Clinical interview with patient and caregiver**

*Standardized questions regarding the following topics are given to both the patient and the caregiver:*

- Reason for referral
- Demographic information
- Medical and social history
- Cognitive symptoms (e.g. memory, orientation, attention, language, problem solving, planning, performing routine tasks)
- Emotional symptoms (e.g. depressed mood, apathy, irritability, hallucinations, inappropriate behavior)
- Physical symptoms (e.g. gait, balance, falls, smell, dizziness, tremor, sleep)
- Basic activities of daily living BADL
- Instrumental activities of daily living IADL

*Questionnaire to be filled out by the caregiver:*

- Nurses' Observation Scale for Geriatric Patients NOSGER II

#### **Clinical examination**

- Weight, height, vital signs
- Neurological examination based on a standardized protocol
- Geriatric evaluation of gait and balance (Get Up and Go Test)
- Additional medical examination if necessary

#### **Further diagnostic examinations if not already performed**

- Imaging of the brain (MRI or CT)
- Blood tests

#### **Neuropsychological assessment**

- Core dementia assessment battery: CERAD plus (Consortium to Establish a Registry for Alzheimer's Disease) completed by neuropsychological tests in the following domains: auditory and visual attention, working memory, abstract thinking, judgment, oral comprehension, mental and written calculation, visual-perceptual skills, apraxia.
- Depression screening: GDS 15 items (Geriatric Depression Scale)
